# Supplementary material for: Insights into Platypus Crural Gland Transcriptomics – Venom and Beyond
Source: Research Square preprint supplement (doi:10.21203/rs.3.rs-7394805/v1), 2025-09-02
Supplement: Supplementary file 1 [file 52bd3f8d327faef33d30c8dd.xlsx]

## Sheet: Sheet1
NCBI Data Collation, Trimming, and Alignment Statistics
Run ID	Author	Tissue Type	Trimmomatic Statistics	HISAT2 Alignment Statistics	Inclusion in Final Dataset	Reason (if no)
SRR065183	Whittington, 2010	In-Season Crural Gland	Input Reads: 4683449 Surviving: 4103020 (87.61%) Dropped: 580429 (12.39%)	4103020 reads; of these: 4103020 (100.00%) were unpaired; of these: 846446 (20.63%) aligned 0 times 3196565 (77.91%) aligned exactly 1 time 60009 (1.46%) aligned >1 times 79.37% overall alignment rate	Yes	NA
SRR065184	Whittington, 2010	In-Season Crural Gland	Input Reads: 4730115 Surviving: 4143061 (87.59%) Dropped: 587054 (12.41%)	4143061 reads; of these: 4143061 (100.00%) were unpaired; of these: 856719 (20.68%) aligned 0 times 3225426 (77.85%) aligned exactly 1 time 60916 (1.47%) aligned >1 times 79.32% overall alignment rate	Yes	NA
SRR065185	Whittington, 2010	In-Season Crural Gland	Input Reads: 4728585 Surviving: 4144301 (87.64%) Dropped: 584284 (12.36%)	4144301 reads; of these: 4144301 (100.00%) were unpaired; of these: 877585 (21.18%) aligned 0 times 3206157 (77.36%) aligned exactly 1 time 60559 (1.46%) aligned >1 times 78.82% overall alignment rate	Yes	NA
SRR065186	Whittington, 2010	In-Season Crural Gland	Input Reads: 4811859 Surviving: 4215063 (87.60%) Dropped: 596796 (12.40%)	4215063 reads; of these: 4215063 (100.00%) were unpaired; of these: 868284 (20.60%) aligned 0 times 3284809 (77.93%) aligned exactly 1 time 61970 (1.47%) aligned >1 times 79.40% overall alignment rate	Yes	NA
SRR065187	Whittington, 2010	In-Season Crural Gland	Input Reads: 4795666 Surviving: 4205184 (87.69%) Dropped: 590482 (12.31%)	4205184 reads; of these: 4205184 (100.00%) were unpaired; of these: 878483 (20.89%) aligned 0 times 3264333 (77.63%) aligned exactly 1 time 62368 (1.48%) aligned >1 times 79.11% overall alignment rate	Yes	NA
SRR065188	Whittington, 2010	In-Season Crural Gland	Input Reads: 4804357 Surviving: 4211165 (87.65%) Dropped: 593192 (12.35%)	4211165 reads; of these: 4211165 (100.00%) were unpaired; of these: 883670 (20.98%) aligned 0 times 3265685 (77.55%) aligned exactly 1 time 61810 (1.47%) aligned >1 times 79.02% overall alignment rate	Yes	NA
SRR065189	Whittington, 2010	In-Season Crural Gland	Input Reads: 4781979 Surviving: 4192088 (87.66%) Dropped: 589891 (12.34%)	4192088 reads; of these: 4192088 (100.00%) were unpaired; of these: 879636 (20.98%) aligned 0 times 3251222 (77.56%) aligned exactly 1 time 61230 (1.46%) aligned >1 times 79.02% overall alignment rate	Yes	NA
SRR065190	Whittington, 2010	In-Season Crural Gland	Input Reads: 4802327 Surviving: 4214887 (87.77%) Dropped: 587440 (12.23%)	4214887 reads; of these: 4214887 (100.00%) were unpaired; of these: 920552 (21.84%) aligned 0 times 3232304 (76.69%) aligned exactly 1 time 62031 (1.47%) aligned >1 times 78.16% overall alignment rate	Yes	NA
SRR5412222	Marin, 2017	Brain	Input Reads: 33586391 Surviving: 33092665 (98.53%) Dropped: 493726 (1.47%)	33092665 reads; of these: 33092665 (100.00%) were unpaired; of these: 767146 (2.32%) aligned 0 times 26962140 (81.47%) aligned exactly 1 time 5363379 (16.21%) aligned >1 times 97.68% overall alignment rate	Yes	NA
SRR5412223	Marin, 2017	Brain	Input Reads: 61145893 Surviving: 59812700 (97.82%) Dropped: 1333193 (2.18%)	59812700 reads; of these: 59812700 (100.00%) were unpaired; of these: 1620606 (2.71%) aligned 0 times 54224560 (90.66%) aligned exactly 1 time 3967534 (6.63%) aligned >1 times 97.29% overall alignment rate	Yes	NA
SRR5412224	Marin, 2017	Brain	Input Reads: 42573904 Surviving: 40940354 (96.16%) Dropped: 1633550 (3.84%)	40940354 reads; of these: 40940354 (100.00%) were unpaired; of these: 1179976 (2.88%) aligned 0 times 36358197 (88.81%) aligned exactly 1 time 3402181 (8.31%) aligned >1 times 97.12% overall alignment rate	Yes	NA
SRR5412225	Marin, 2017	Brain	Input Reads: 39244392 Surviving: 35895429 (91.47%) Dropped: 3348963 (8.53%)	35895429 reads; of these: 35895429 (100.00%) were unpaired; of these: 1575442 (4.39%) aligned 0 times 30644087 (85.37%) aligned exactly 1 time 3675900 (10.24%) aligned >1 times 95.61% overall alignment rate	Yes	NA
SRR5412226	Marin, 2017	Heart	Input Reads: 61389676 Surviving: 59462965 (96.86%) Dropped: 1926711 (3.14%)	59462965 reads; of these: 59462965 (100.00%) were unpaired; of these: 1960078 (3.30%) aligned 0 times 41127326 (69.16%) aligned exactly 1 time 16375561 (27.54%) aligned >1 times 96.70% overall alignment rate	Yes	NA
SRR5412227	Marin, 2017	Heart	Input Reads: 39757003 Surviving: 38549743 (96.96%) Dropped: 1207260 (3.04%)	38549743 reads; of these: 38549743 (100.00%) were unpaired; of these: 1182575 (3.07%) aligned 0 times 31989023 (82.98%) aligned exactly 1 time 5378145 (13.95%) aligned >1 times 96.93% overall alignment rate	Yes	NA
SRR5412228	Marin, 2017	Heart	Input Reads: 55287820 Surviving: 51146883 (92.51%) Dropped: 4140937 (7.49%)	51146883 reads; of these: 51146883 (100.00%) were unpaired; of these: 2870628 (5.61%) aligned 0 times 46692326 (91.29%) aligned exactly 1 time 1583929 (3.10%) aligned >1 times 94.39% overall alignment rate	Yes	NA
SRR5412229	Marin, 2017	Heart	Input Reads: 51234843 Surviving: 46831991 (91.41%) Dropped: 4402852 (8.59%)	46831991 reads; of these: 46831991 (100.00%) were unpaired; of these: 1599504 (3.42%) aligned 0 times 32892106 (70.23%) aligned exactly 1 time 12340381 (26.35%) aligned >1 times 96.58% overall alignment rate	Yes	NA
SRR5412230	Marin, 2017	Kidney	Input Reads: 53428414 Surviving: 52001776 (97.33%) Dropped: 1426638 (2.67%)	52001776 reads; of these: 52001776 (100.00%) were unpaired; of these: 1674682 (3.22%) aligned 0 times 44245530 (85.08%) aligned exactly 1 time 6081564 (11.69%) aligned >1 times 96.78% overall alignment rate	Yes	NA
SRR5412231	Marin, 2017	Kidney	Input Reads: 79213734 Surviving: 76369475 (96.41%) Dropped: 2844259 (3.59%)	76369475 reads; of these: 76369475 (100.00%) were unpaired; of these: 2330629 (3.05%) aligned 0 times 66228172 (86.72%) aligned exactly 1 time 7810674 (10.23%) aligned >1 times 96.95% overall alignment rate	Yes	NA
SRR5412232	Marin, 2017	Kidney	Input Reads: 35584387 Surviving: 32946049 (92.59%) Dropped: 2638338 (7.41%)	32946049 reads; of these: 32946049 (100.00%) were unpaired; of these: 1513283 (4.59%) aligned 0 times 28211828 (85.63%) aligned exactly 1 time 3220938 (9.78%) aligned >1 times 95.41% overall alignment rate	Yes	NA
SRR5412233	Marin, 2017	Kidney	Input Reads: 30164329 Surviving: 27304355 (90.52%) Dropped: 2859974 (9.48%)	27304355 reads; of these: 27304355 (100.00%) were unpaired; of these: 1227126 (4.49%) aligned 0 times 22589354 (82.73%) aligned exactly 1 time 3487875 (12.77%) aligned >1 times 95.51% overall alignment rate	Yes	NA
SRR5412234	Marin, 2017	Liver	Input Reads: 31815301 Surviving: 30937990 (97.24%) Dropped: 877311 (2.76%)	30937990 reads; of these: 30937990 (100.00%) were unpaired; of these: 795435 (2.57%) aligned 0 times 27527781 (88.98%) aligned exactly 1 time 2614774 (8.45%) aligned >1 times 97.43% overall alignment rate	Yes	NA
SRR5412235	Marin, 2017	Liver	Input Reads: 57726918 Surviving: 55630929 (96.37%) Dropped: 2095989 (3.63%)	55630929 reads; of these: 55630929 (100.00%) were unpaired; of these: 1789953 (3.22%) aligned 0 times 50857580 (91.42%) aligned exactly 1 time 2983396 (5.36%) aligned >1 times 96.78% overall alignment rate	Yes	NA
SRR5412236	Marin, 2017	Liver	Input Reads: 25244792 Surviving: 22934032 (90.85%) Dropped: 2310760 (9.15%)	22934032 reads; of these: 22934032 (100.00%) were unpaired; of these: 1330695 (5.80%) aligned 0 times 19996330 (87.19%) aligned exactly 1 time 1607007 (7.01%) aligned >1 times 94.20% overall alignment rate	Yes	NA
SRR5412237	Marin, 2017	Liver	Input Reads: 58323344 Surviving: 52169394 (89.45%) Dropped: 6153950 (10.55%)	52169394 reads; of these: 52169394 (100.00%) were unpaired; of these: 2489767 (4.77%) aligned 0 times 45703324 (87.61%) aligned exactly 1 time 3976303 (7.62%) aligned >1 times 95.23% overall alignment rate	Yes	NA
SRR5412238	Marin, 2017	Ovary	Input Reads: 41540320 Surviving: 39691558 (95.55%) Dropped: 1848762 (4.45%)	39691558 reads; of these: 39691558 (100.00%) were unpaired; of these: 1281216 (3.23%) aligned 0 times 36554966 (92.10%) aligned exactly 1 time 1855376 (4.67%) aligned >1 times 96.77% overall alignment rate	Yes	NA
SRR5412239	Marin, 2017	Ovary	Input Reads: 35757932 Surviving: 34613955 (96.80%) Dropped: 1143977 (3.20%)	34613955 reads; of these: 34613955 (100.00%) were unpaired; of these: 1394719 (4.03%) aligned 0 times 32021342 (92.51%) aligned exactly 1 time 1197894 (3.46%) aligned >1 times 95.97% overall alignment rate	Yes	NA
SRR5412240	Marin, 2017	Testis	Input Reads: 34820608 Surviving: 33222197 (95.41%) Dropped: 1598411 (4.59%)	33222197 reads; of these: 33222197 (100.00%) were unpaired; of these: 1359704 (4.09%) aligned 0 times 30779581 (92.65%) aligned exactly 1 time 1082912 (3.26%) aligned >1 times 95.91% overall alignment rate	Yes	NA
SRR5412241	Marin, 2017	Testis	Input Reads: 57864252 Surviving: 52056688 (89.96%) Dropped: 5807564 (10.04%)	52056688 reads; of these: 52056688 (100.00%) were unpaired; of these: 2719435 (5.22%) aligned 0 times 47397517 (91.05%) aligned exactly 1 time 1939736 (3.73%) aligned >1 times 94.78% overall alignment rate	Yes	NA
SRR306725	Brawand, 2011	Brain	Input Reads: 24343340 Surviving: 24098945 (99.00%) Dropped: 244395 (1.00%)	24098945 reads; of these: 24098945 (100.00%) were unpaired; of these: 5263206 (21.84%) aligned 0 times 16976080 (70.44%) aligned exactly 1 time 1859659 (7.72%) aligned >1 times 78.16% overall alignment rate	Yes	NA
SRR306726	Brawand, 2011	Brain	Input Reads: 9306487 Surviving: 9059570 (97.35%) Dropped: 246917 (2.65%)	9059570 reads; of these: 9059570 (100.00%) were unpaired; of these: 1837448 (20.28%) aligned 0 times 6744347 (74.44%) aligned exactly 1 time 477775 (5.27%) aligned >1 times 79.72% overall alignment rate	Yes	NA
SRR306727	Brawand, 2011	Brain	Input Reads: 13655446 Surviving: 13496909 (98.84%) Dropped: 158537 (1.16%)	13496909 reads; of these: 13496909 (100.00%) were unpaired; of these: 2414883 (17.89%) aligned 0 times 10257044 (76.00%) aligned exactly 1 time 824982 (6.11%) aligned >1 times 82.11% overall alignment rate	Yes	NA
SRR306728	Brawand, 2011	Cerebellum	Input Reads: 30295126 Surviving: 29280607 (96.65%) Dropped: 1014519 (3.35%)	29280607 reads; of these: 29280607 (100.00%) were unpaired; of these: 7189093 (24.55%) aligned 0 times 21015410 (71.77%) aligned exactly 1 time 1076104 (3.68%) aligned >1 times 75.45% overall alignment rate	Yes	NA
SRR306730	Brawand, 2011	Heart	Input Reads: 18807127 Surviving: 18632875 (99.07%) Dropped: 174252 (0.93%)	18632875 reads; of these: 18632875 (100.00%) were unpaired; of these: 4454388 (23.91%) aligned 0 times 12121633 (65.06%) aligned exactly 1 time 2056854 (11.04%) aligned >1 times 76.09% overall alignment rate	Yes	NA
SRR306731	Brawand, 2011	Heart	Input Reads: 16876055 Surviving: 16704898 (98.99%) Dropped: 171157 (1.01%)	16704898 reads; of these: 16704898 (100.00%) were unpaired; of these: 3874599 (23.19%) aligned 0 times 10468675 (62.67%) aligned exactly 1 time 2361624 (14.14%) aligned >1 times 76.81% overall alignment rate	Yes	NA
SRR306734	Brawand, 2011	Kidney	Input Reads: 16081270 Surviving: 15871911 (98.70%) Dropped: 209359 (1.30%)	15871911 reads; of these: 15871911 (100.00%) were unpaired; of these: 3122392 (19.67%) aligned 0 times 11718048 (73.83%) aligned exactly 1 time 1031471 (6.50%) aligned >1 times 80.33% overall alignment rate	Yes	NA
SRR306736	Brawand, 2011	Liver	Input Reads: 21513648 Surviving: 21301744 (99.02%) Dropped: 211904 (0.98%)	21301744 reads; of these: 21301744 (100.00%) were unpaired; of these: 5268711 (24.73%) aligned 0 times 15110862 (70.94%) aligned exactly 1 time 922171 (4.33%) aligned >1 times 75.27% overall alignment rate	Yes	NA
SRR414996	Julien, 2012	Ovary	Input Reads: 38501799 Surviving: 37981618 (98.65%) Dropped: 520181 (1.35%)	37981618 reads; of these: 37981618 (100.00%) were unpaired; of these: 2362347 (6.22%) aligned 0 times 34711291 (91.39%) aligned exactly 1 time 907980 (2.39%) aligned >1 times 93.78% overall alignment rate	Yes	NA
SRR414997	Julien, 2012	Fibroblast	Input Reads: 34750907 Surviving: 34383146 (98.94%) Dropped: 367761 (1.06%)	34383146 reads; of these: 34383146 (100.00%) were unpaired; of these: 2901040 (8.44%) aligned 0 times 30383596 (88.37%) aligned exactly 1 time 1098510 (3.19%) aligned >1 times 91.56% overall alignment rate	Yes	NA
SRR414998	Julien, 2012	Fibroblast	Input Reads: 38287029 Surviving: 37825794 (98.80%) Dropped: 461235 (1.20%)	37825794 reads; of these: 37825794 (100.00%) were unpaired; of these: 2552495 (6.75%) aligned 0 times 34109676 (90.18%) aligned exactly 1 time 1163623 (3.08%) aligned >1 times 93.25% overall alignment rate	Yes	NA
SRR649381	Necsulea, 2014	Brain	Input Reads: 30611890 Surviving: 30471397 (99.54%) Dropped: 140493 (0.46%)	30471397 reads; of these: 30471397 (100.00%) were unpaired; of these: 2753920 (9.04%) aligned 0 times 26355594 (86.49%) aligned exactly 1 time 1361883 (4.47%) aligned >1 times 90.96% overall alignment rate	Yes	NA
SRR649382	Necsulea, 2014	Ovary	Input Reads: 38501799 Surviving: 38006322 (98.71%) Dropped: 495477 (1.29%)	38006322 reads; of these: 38006322 (100.00%) were unpaired; of these: 2959358 (7.79%) aligned 0 times 34153805 (89.86%) aligned exactly 1 time 893159 (2.35%) aligned >1 times 92.21% overall alignment rate	Yes	NA
SRR649383	Necsulea, 2014	Testis	Input Reads: 33706856 Surviving: 33525361 (99.46%) Dropped: 181495 (0.54%)	33525361 reads; of these: 33525361 (100.00%) were unpaired; of these: 3592861 (10.72%) aligned 0 times 28897850 (86.20%) aligned exactly 1 time 1034650 (3.09%) aligned >1 times 89.28% overall alignment rate	Yes	NA
SRR649384	Necsulea, 2014	Testis	Input Reads: 29567173 Surviving: 29410002 (99.47%) Dropped: 157171 (0.53%)	29410002 reads; of these: 29410002 (100.00%) were unpaired; of these: 3239642 (11.02%) aligned 0 times 25287326 (85.98%) aligned exactly 1 time 883034 (3.00%) aligned >1 times 88.98% overall alignment rate	Yes	NA
SRR943349	Necsulea, 2014	Ovary	Input Reads: 23660000 Surviving: 22679379 (95.86%) Dropped: 980621 (4.14%)	22679379 reads; of these: 22679379 (100.00%) were unpaired; of these: 839102 (3.70%) aligned 0 times 20791012 (91.67%) aligned exactly 1 time 1049265 (4.63%) aligned >1 times 96.30% overall alignment rate	Yes	NA
SRR943350	Necsulea, 2014	Ovary	Input Reads: 29166212 Surviving: 27599675 (94.63%) Dropped: 1566537 (5.37%)	27599675 reads; of these: 27599675 (100.00%) were unpaired; of these: 1080961 (3.92%) aligned 0 times 25010941 (90.62%) aligned exactly 1 time 1507773 (5.46%) aligned >1 times 96.08% overall alignment rate	Yes	NA
SRR306724	Brawand, 2011	Brain	Input Reads: 10797205 Surviving: 10646420 (98.60%) Dropped: 150785 (1.40%)	10646420 reads; of these: 10646420 (100.00%) were unpaired; of these: 2742150 (25.76%) aligned 0 times 7273626 (68.32%) aligned exactly 1 time 630644 (5.92%) aligned >1 times 74.24% overall alignment rate	No	<75% overall alignment rate
SRR306729	Brawand, 2011	Cerebellum	Input Reads: 28415530 Surviving: 26630231 (93.72%) Dropped: 1785299 (6.28%)	26630231 reads; of these: 26630231 (100.00%) were unpaired; of these: 6947171 (26.09%) aligned 0 times 18555861 (69.68%) aligned exactly 1 time 1127199 (4.23%) aligned >1 times 73.91% overall alignment rate	No	<75% overall alignment rate
SRR306732	Brawand, 2011	Kidney	Input Reads: 17863241 Surviving: 17670346 (98.92%) Dropped: 192895 (1.08%)	17670346 reads; of these: 17670346 (100.00%) were unpaired; of these: 6905012 (39.08%) aligned 0 times 10293766 (58.25%) aligned exactly 1 time 471568 (2.67%) aligned >1 times 60.92% overall alignment rate	No	<75% overall alignment rate
SRR306733	Brawand, 2011	Kidney	Input Reads: 11621158 Surviving: 11468208 (98.68%) Dropped: 152950 (1.32%)	11468208 reads; of these: 11468208 (100.00%) were unpaired; of these: 3153287 (27.50%) aligned 0 times 7671798 (66.90%) aligned exactly 1 time 643123 (5.61%) aligned >1 times 72.50% overall alignment rate	No	<75% overall alignment rate
SRR306735	Brawand, 2011	Liver	Input Reads: 15860299 Surviving: 15693091 (98.95%) Dropped: 167208 (1.05%)	15693081 reads; of these: 15693081 (100.00%) were unpaired; of these: 6296418 (40.12%) aligned 0 times 8887478 (56.63%) aligned exactly 1 time 509185 (3.24%) aligned >1 times 59.88% overall alignment rate	No	<75% overall alignment rate
SRR306737	Brawand, 2011	Liver	Input Reads: 18120338 Surviving: 18074130 (99.74%) Dropped: 46208 (0.26%)	18074130 reads; of these: 18074130 (100.00%) were unpaired; of these: 8222051 (45.49%) aligned 0 times 9321450 (51.57%) aligned exactly 1 time 530629 (2.94%) aligned >1 times 54.51% overall alignment rate	No	<75% overall alignment rate
SRR306738	Brawand, 2011	Liver	Input Reads: 19760891 Surviving: 19587708 (99.12%) Dropped: 173183 (0.88%)	19587708 reads; of these: 19587708 (100.00%) were unpaired; of these: 6594117 (33.66%) aligned 0 times 12317803 (62.89%) aligned exactly 1 time 675788 (3.45%) aligned >1 times 66.34% overall alignment rate	No	<75% overall alignment rate
SRR306739	Brawand, 2011	Testis	Input Reads: 18898747 Surviving: 18882597 (99.91%) Dropped: 16150 (0.09%)	18882597 reads; of these: 18882597 (100.00%) were unpaired; of these: 8830632 (46.77%) aligned 0 times 9540532 (50.53%) aligned exactly 1 time 511433 (2.71%) aligned >1 times 53.23% overall alignment rate	No	<75% overall alignment rate
SRR306740	Brawand, 2011	Testis	Input Reads: 24663459 Surviving: 24430932 (99.06%) Dropped: 232527 (0.94%)	24430932 reads; of these: 24430932 (100.00%) were unpaired; of these: 6551352 (26.82%) aligned 0 times 16823402 (68.86%) aligned exactly 1 time 1056178 (4.32%) aligned >1 times 73.18% overall alignment rate	No	<75% overall alignment rate
SRR306741	Brawand, 2011	Testis	Input Reads: 25238261 Surviving: 25008274 (99.09%) Dropped: 229987 (0.91%)	25008274 reads; of these: 25008274 (100.00%) were unpaired; of these: 6879288 (27.51%) aligned 0 times 17066179 (68.24%) aligned exactly 1 time 1062807 (4.25%) aligned >1 times 72.49% overall alignment rate	No	<75% overall alignment rate
SRR1289525	Lynch, 2015	Pregnant endometrium	Input Reads: 32805984 Surviving: 32613433 (99.41%) Dropped: 192551 (0.59%)	32613433 reads; of these: 32613433 (100.00%) were unpaired; of these: 25477974 (78.12%) aligned 0 times 6798176 (20.84%) aligned exactly 1 time 337283 (1.03%) aligned >1 times 21.88% overall alignment rate	No	<75% overall alignment rate
ERR2812421	European Bioinformatics Institute, 2019	Brain	Input Reads: 88501433 Surviving: 85975262 (97.15%) Dropped: 2526171 (2.85%)	85975262 reads; of these: 85975262 (100.00%) were unpaired; of these: 44178929 (51.39%) aligned 0 times 28001375 (32.57%) aligned exactly 1 time 13794958 (16.05%) aligned >1 times 48.61% overall alignment rate	No	<75% overall alignment rate
ERR2812422	European Bioinformatics Institute, 2019	Brain	Input Reads: 171327962 Surviving: 170514981 (99.53%) Dropped: 812981 (0.47%)	170514981 reads; of these: 170514981 (100.00%) were unpaired; of these: 99304710 (58.24%) aligned 0 times 62285738 (36.53%) aligned exactly 1 time 8924533 (5.23%) aligned >1 times 41.76% overall alignment rate	No	<75% overall alignment rate
ERR2812423	European Bioinformatics Institute, 2019	Brain	Input Reads: 253646689 Surviving: 252358439 (99.49%) Dropped: 1288250 (0.51%)	252358439 reads; of these: 252358439 (100.00%) were unpaired; of these: 141350777 (56.01%) aligned 0 times 62288123 (24.68%) aligned exactly 1 time 48719539 (19.31%) aligned >1 times 43.99% overall alignment rate	No	<75% overall alignment rate
ERR2812427	European Bioinformatics Institute, 2019	Liver	Input Reads: 107403200 Surviving: 103561284 (96.42%) Dropped: 3841916 (3.58%)	103561284 reads; of these: 103561284 (100.00%) were unpaired; of these: 66018813 (63.75%) aligned 0 times 29005000 (28.01%) aligned exactly 1 time 8537471 (8.24%) aligned >1 times 36.25% overall alignment rate	No	<75% overall alignment rate
ERR2812428	European Bioinformatics Institute, 2019	Liver	Input Reads: 231566293 Surviving: 227827794 (98.39%) Dropped: 3738499 (1.61%)	227827794 reads; of these: 227827794 (100.00%) were unpaired; of these: 164770216 (72.32%) aligned 0 times 44528301 (19.54%) aligned exactly 1 time 18529277 (8.13%) aligned >1 times 27.68% overall alignment rate	No	<75% overall alignment rate
ERR2812429	European Bioinformatics Institute, 2019	Liver	Input Reads: 315432693 Surviving: 309749069 (98.20%) Dropped: 5683624 (1.80%)	309749069 reads; of these: 309749069 (100.00%) were unpaired; of these: 238354693 (76.95%) aligned 0 times 44942715 (14.51%) aligned exactly 1 time 26451661 (8.54%) aligned >1 times 23.05% overall alignment rate	No	<75% overall alignment rate
ERR2812433	European Bioinformatics Institute, 2019	Testis	Input Reads: 252039947 Surviving: 249088813 (98.83%) Dropped: 2951134 (1.17%)	249088813 reads; of these: 249088813 (100.00%) were unpaired; of these: 93226397 (37.43%) aligned 0 times 129727457 (52.08%) aligned exactly 1 time 26134959 (10.49%) aligned >1 times 62.57% overall alignment rate	No	<75% overall alignment rate
ERR2812434	European Bioinformatics Institute, 2019	Testis	Input Reads: 77822580 Surviving: 77512317 (99.60%) Dropped: 310263 (0.40%)	77512317 reads; of these: 77512317 (100.00%) were unpaired; of these: 42978316 (55.45%) aligned 0 times 28956231 (37.36%) aligned exactly 1 time 5577770 (7.20%) aligned >1 times 44.55% overall alignment rate	No	<75% overall alignment rate
ERR2812435	European Bioinformatics Institute, 2019	Testis	Input Reads: 110278715 Surviving: 109191765 (99.01%) Dropped: 1086950 (0.99%)	109191765 reads; of these: 109191765 (100.00%) were unpaired; of these: 61476350 (56.30%) aligned 0 times 41616461 (38.11%) aligned exactly 1 time 6098954 (5.59%) aligned >1 times 43.70% overall alignment rate	No	<75% overall alignment rate
