# Supplementary material for: Insights into Platypus Crural Gland Transcriptomics – Venom and Beyond
Source: Research Square preprint supplement (doi:10.21203/rs.3.rs-7394805/v1), 2025-09-02
Supplement: Supplementary file 2 [file 5615b3cf581d9abe4705bf68.xlsx]

## Sheet: Sheet1
Extended DeTox Results
ID	Associated gene	Previously identified transcript/s	Previously identified venom component	signalp_prediction	prob_signal	wolfpsort_prediction	Database	DomainID	DomainDescription	IPR_accession	IPR_description	GO_terms	toxinDB_sseqid	toxinDB_pident	toxinDB_evalue	uniprot_sseqid	uniprot_pident	uniprot_evalue	venomDB_sseqid	venomDB_pident	venomDB_evalue	platypusproteinDB_sseqid	platypusproteinDB_pident	platypusproteinDB_evalue	RepeatsTypes	RepeatsLengths	Cys_pattern
XM_029063167.2_ORF.1	LOC100083360	Yes (Wong et al., 2012): CRF-BP	Yes (Wong et al., 2012)	SP(Sec/SPI)	0.986288	extr	Pfam;PIRSF;PANTHER;SUPERFAMILY;Gene3D	PF05428;PIRSF009279;PTHR10278;SSF49854;G3DSA:2.60.120.290	Corticotropin-releasing factor binding protein (CRF-BP);CRF-BP;CORTICOTROPIN-RELEASING FACTOR-BINDING PROTEIN;Spermadhesin, CUB domain	IPR008435;IPR035914	Corticotropin-releasing factor-binding protein;Spermadhesin, CUB domain superfamily	GO:0051424;-	No hits	NA	NA	sp|P24387|CRHBP_HUMAN	65.831	6.13e-153	No hits	NA	NA	tr|K4PLU9|K4PLU9_ORNAN	99.683	0	L	5	C-C-C-C-C-C-C-C-C-C
XM_016226360.3_ORF.1	LOC107547358	No	No	SP(Sec/SPI)	0.998521	extr	Pfam;PANTHER;SUPERFAMILY	PF01099;PTHR10136:SF6;PTHR10136;SSF48201	Uteroglobin family;UTEROGLOBIN;SECRETOGLOBIN FAMILY 1 MEMBER;Uteroglobin-like	IPR016126;-;IPR043215;IPR035960	Secretoglobin;-;Secretoglobin family 1C-like;Secretoglobin superfamily	-	No hits	NA	NA	No hits	NA	NA	No hits	NA	NA	No hits	NA	NA	None		None
XM_001513234.4_ORF.1	FGFBP1	No	No	SP(Sec/SPI)	0.990448	extr	Pfam;PANTHER	PF06473;PTHR15258;PTHR15258:SF2	FGF binding protein 1 (FGF-BP1);FGF BINDING PROTEIN-RELATED;FIBROBLAST GROWTH FACTOR-BINDING PROTEIN 1	IPR010510;-	FGF binding 1;-	-	No hits	NA	NA	sp|Q14512|FGFP1_HUMAN	39.631	4.82e-48	No hits	NA	NA	tr|F7EXB4|F7EXB4_ORNAN	100	5.28e-176	None	NA	C-C-C-C-C-C-C-C-C-C
XM_029064327.1_ORF.1	KLK7	Partial (Whittington et al., 2010): 37_VSPL_BOTAS & 84_ENSOANT00000023650_partial	No	SP(Sec/SPI)	0.984628	extr	Pfam;PANTHER;SMART;CDD;SUPERFAMILY;Gene3D;PRINTS	PF00089;PTHR24271;PTHR24271:SF45;SM00020;cd00190;SSF50494;G3DSA:2.40.10.10;PR00722	Trypsin;KALLIKREIN-RELATED;KALLIKREIN-7;trypsin_2;Tryp_SPc;Trypsin-like serine proteases;-;Chymotrypsin serine protease family (S1) signature	IPR001254;-;IPR009003;IPR043504;IPR001314	Serine proteases, trypsin domain;-;Peptidase S1, PA clan;Peptidase S1, PA clan, chymotrypsin-like fold;Peptidase S1A, chymotrypsin family	GO:0004252|GO:0006508;-	No hits	NA	NA	sp|Q91VE3|KLK7_MOUSE	61.475	1.87e-112	sp|Q5MCS0|VSPHA_HYDHA	38.431	3.63e-61	tr|A0A6I8NUD0|A0A6I8NUD0_ORNAN	100	0	L	8	C-C-C-C-C-C-C-C-C-C-C-C
XM_029064328.1_ORF.5	LOC100090533	Partial (Whittington et al., 2010): 43_VSP10_TRIST & 83_ENSOANT00000017802_partial	No	SP(Sec/SPI)	0.992461	extr	Pfam;PANTHER;SMART;CDD;SUPERFAMILY;Gene3D;PRINTS	PF00089;PTHR24271:SF19;PTHR24271;SM00020;cd00190;SSF50494;G3DSA:2.40.10.10;PR00722	Trypsin;KALLIKREIN-6;KALLIKREIN-RELATED;trypsin_2;Tryp_SPc;Trypsin-like serine proteases;-;Chymotrypsin serine protease family (S1) signature	IPR001254;-;IPR009003;IPR043504;IPR001314	Serine proteases, trypsin domain;-;Peptidase S1, PA clan;Peptidase S1, PA clan, chymotrypsin-like fold;Peptidase S1A, chymotrypsin family	GO:0004252|GO:0006508;-	No hits	NA	NA	sp|Q92876|KLK6_HUMAN	61.224	2.7e-110	sp|Q09GK1|VSP_PHIOL	41.434	4.8e-62	tr|F7FBK4|F7FBK4_ORNAN	100	0	A	5	C-C-C-C-C-C-C-C-C-C-C-C
XM_029064368.2_ORF.9	KLK1	No	No	SP(Sec/SPI)	0.800714	extr	Pfam;PANTHER;SMART;CDD;SUPERFAMILY;Gene3D;PRINTS	PF00089;PTHR24271:SF47;PTHR24271;SM00020;cd00190;SSF50494;G3DSA:2.40.10.10;PR00722	Trypsin;KALLIKREIN-1;KALLIKREIN-RELATED;trypsin_2;Tryp_SPc;Trypsin-like serine proteases;-;Chymotrypsin serine protease family (S1) signature	IPR001254;-;IPR009003;IPR043504;IPR001314	Serine proteases, trypsin domain;-;Peptidase S1, PA clan;Peptidase S1, PA clan, chymotrypsin-like fold;Peptidase S1A, chymotrypsin family	GO:0004252|GO:0006508;-	No hits	NA	NA	sp|P06870|KLK1_HUMAN	49.43	9.15e-88	sp|Q5MCS0|VSPHA_HYDHA	37.269	8.46e-59	tr|A0A6I8NN48|A0A6I8NN48_ORNAN	100	0	None		C-C-C-C-C-C-C-C-C-C
XM_029070158.1_ORF.1	LOC114813694	Yes (Wong et al., 2012): kunitz	Yes (Wong et al., 2012)	SP(Sec/SPI)	0.933877	extr	Pfam;PANTHER;SMART;Gene3D;CDD;SUPERFAMILY;PRINTS	PF00014;PTHR10083:SF357;PTHR10083;SM00131;G3DSA:4.10.410.10;cd00109;SSF57362;PR00759	Kunitz/Bovine pancreatic trypsin inhibitor domain;COLOSTRUM TRYPSIN INHIBITOR;KUNITZ-TYPE PROTEASE INHIBITOR-RELATED;KU_2;Pancreatic trypsin inhibitor Kunitz domain;KU;BPTI-like;Basic protease (Kunitz-type) inhibitor family signature	IPR002223;-;IPR036880	Pancreatic trypsin inhibitor Kunitz domain;-;Pancreatic trypsin inhibitor Kunitz domain superfamily	GO:0004867;-	No hits	NA	NA	sp|A0A6P8HC43|ATPI1_ACTTE	39.437	5.7e-24	sp|W4VSH9|VKT1_TRILK	34.591	7.95e-26	tr|K4PLV6|K4PLV6_ORNAN	100	5.19e-115	None	NA	C-C-C-C-C-C-C-C-C-C-C-C
XM_016227951.3_ORF.1	KERA	No	No	SP(Sec/SPI)	0.954623	extr	Pfam;PANTHER;SUPERFAMILY;Gene3D;SMART	PF13855;PF01462;PTHR45712:SF13;PTHR45712;SSF52058;G3DSA:3.80.10.10;SM00013	Leucine rich repeat;Leucine rich repeat N-terminal domain;KERATOCAN;AGAP008170-PA;L domain-like;Ribonuclease Inhibitor;lrrnt1	IPR001611;IPR000372;-;IPR032675	Leucine-rich repeat;Leucine-rich repeat N-terminal domain;-;Leucine-rich repeat domain superfamily	GO:0005515;-	No hits	NA	NA	sp|O62702|KERA_BOVIN	83.523	0	No hits	NA	NA	tr|F7C669|F7C669_ORNAN	100	0	None	NA	C-C-C-C-C-C
XM_029081728.2_ORF.1	LPO	No	No	SP(Sec/SPI)	0.986151	E.R.	Pfam;PANTHER;CDD;Gene3D;SUPERFAMILY;PRINTS	PF03098;PTHR11475;cd09824;PTHR11475:SF67;G3DSA:1.10.640.10;SSF48113;PR00457	Animal haem peroxidase;OXIDASE/PEROXIDASE;myeloperoxidase_like;LACTOPEROXIDASE;Haem peroxidase domain superfamily, animal type;Heme-dependent peroxidases;Animal haem peroxidase signature	IPR019791;-;IPR029587;IPR037120;IPR010255	Haem peroxidase, animal-type;-;Lactoperoxidase;Haem peroxidase domain superfamily, animal type;Haem peroxidase superfamily	-;GO:0036393|GO:0042742;GO:0004601|GO:0006979|GO:0020037	No hits	NA	NA	sp|P22079|PERL_HUMAN	69.038	0	No hits	NA	NA	tr|F7CCN5|F7CCN5_ORNAN	100	0	None	NA	C-C-C-C-C-C-C-C-C-C-C-C-C-C
XM_029046826.2_ORF.1	LOC100091528	No	No	SP(Sec/SPI)	0.977011	extr	Pfam;PANTHER;PIRSF;Gene3D;SUPERFAMILY;PRINTS	PF00262;PTHR11073:SF14;PTHR11073;PIRSF002356;G3DSA:2.60.120.200;SSF49899;PR00626;SSF63887;G3DSA:2.10.250.10	Calreticulin family;CALRETICULIN 4;CALRETICULIN AND CALNEXIN;Calreticulin;-;Concanavalin A-like lectins/glucanases;Calreticulin signature;P-domain of calnexin/calreticulin;Calreticulin/calnexin, P domain	IPR001580;-;IPR009169;IPR013320;IPR009033	Calreticulin/calnexin;-;Calreticulin;Concanavalin A-like lectin/glucanase domain superfamily;Calreticulin/calnexin, P domain superfamily	GO:0005509|GO:0005783|GO:0006457|GO:0051082;-;GO:0005509|GO:0005515	No hits	NA	NA	sp|P28491|CALR_PIG	68.079	0	No hits	NA	NA	tr|A0A6I8NPH8|A0A6I8NPH8_ORNAN	93.822	0	E	9	None
XR_486810.3_ORF.3	LOC103171488	No	No	SP(Sec/SPI)	0.999316	extr	Pfam;Gene3D;SUPERFAMILY	PF00711;G3DSA:3.10.360.10;SSF57392	Beta defensin;-;Defensin-like	IPR001855;-	Beta defensin type;-	GO:0005576|GO:0006952;-	No hits	NA	NA	No hits	NA	NA	No hits	NA	NA	No hits	NA	NA	None	NA	C-C-C-C-CC
XM_029049771.2_ORF.1	LOC103170591	No	No	SP(Sec/SPI)	0.997579	extr	Pfam;PANTHER;SMART;SUPERFAMILY;Gene3D	PF00050;PTHR21312:SF28;PTHR21312;SM00280;SSF100895;G3DSA:3.30.60.30	Kazal-type serine protease inhibitor domain;OVOMUCOID-RELATED;SERINE PROTEASE INHIBITOR;kazal_3;Kazal-type serine protease inhibitors;-	IPR002350;-;IPR036058	Kazal domain;-;Kazal domain superfamily	GO:0005515;-	No hits	NA	NA	sp|P01002|IPSG_CANLF	52.252	1.66e-32	No hits	NA	NA	tr|A0A6I8P3D2|A0A6I8P3D2_ORNAN	52.427	1.53e-27	None	NA	C-C-C-C-C-C-C-C-C-C-C-C
XM_003431054.3_ORF.1	LOC100681171	No	No	SP(Sec/SPI)	0.971443	extr	Pfam;PANTHER;Gene3D;SUPERFAMILY;PRINTS	PF00061;PTHR11430;PTHR11430:SF1;G3DSA:2.40.128.20;SSF50814;PR00179	Lipocalin / cytosolic fatty-acid binding protein family;LIPOCALIN;EPIDIDYMAL-SPECIFIC LIPOCALIN-8;-;Lipocalins;Lipocalin signature	IPR000566;IPR002345;-;IPR012674	Lipocalin/cytosolic fatty-acid binding domain;Lipocalin;-;Calycin	-;GO:0036094	No hits	NA	NA	sp|Q6UWW0|LCN15_HUMAN	37.43	8.98e-25	No hits	NA	NA	tr|F7AIG0|F7AIG0_ORNAN	99.27	1.13e-100	None	NA	None
XM_AWGGnovel_OvDLP-B_ORF.1	AWGGnovel_OvDLP-B	Yes (Whittington, Papenfuss, Bansal, et al., 2008): DLP-B	Yes (Torres et al., 1999; Wong et al., 2012)	SP(Sec/SPI)	0.999268	extr	Pfam;Gene3D;SUPERFAMILY	PF08131;G3DSA:2.20.20.10;SSF57392	Defensin-like peptide family;-;Defensin-like	IPR012553;IPR023355;-	Defensin-like peptide;Myotoxin/Anemone neurotoxin domain superfamily;-	GO:0005576;-	sp|P82140|DLP2_ORNAN	100	1.12e-50	sp|P82140|DLP2_ORNAN	100	5.45e-45	sp|P82140|DLP2_ORNAN	100	2e-47	sp|P82140|DLP2_ORNAN	100	5.91e-46	L	5	C-C-C-C-CC
XM_AWGGnovel_OvDLP-A_ORF.3	AWGGnovel_OvDLP-A	Yes (Whittington, Papenfuss, Bansal, et al., 2008): DLP-A	Yes (Wong et al., 2012)	SP(Sec/SPI)	0.999782	extr	Pfam;Gene3D;SUPERFAMILY	PF08131;G3DSA:2.20.20.10;SSF57392	Defensin-like peptide family;-;Defensin-like	IPR012553;IPR023355;-	Defensin-like peptide;Myotoxin/Anemone neurotoxin domain superfamily;-	GO:0005576;-	sp|P0C8B2|DLPA_ORNAN	98.485	1.39e-48	sp|P0C8B2|DLPA_ORNAN	98.485	6.77e-43	sp|P0C8B2|DLPA_ORNAN	98.485	2.49e-45	tr|A0A6I8NVS1|A0A6I8NVS1_ORNAN	100	2.05e-44	L	5	C-C-C-C-CC
MSTRG8465.1_ORF.3	MSTRG.8465	No	No	SP(Sec/SPI)	0.995858	extr	Pfam;PANTHER;SUPERFAMILY	PF01099;PTHR10136:SF6;PTHR10136;SSF48201	Uteroglobin family;UTEROGLOBIN;SECRETOGLOBIN FAMILY 1 MEMBER;Uteroglobin-like	IPR016126;-;IPR043215;IPR035960	Secretoglobin;-;Secretoglobin family 1C-like;Secretoglobin superfamily	-	No hits	NA	NA	No hits	NA	NA	No hits	NA	NA	No hits	NA	NA	None	NA
MSTRG8471.1_ORF.3	MSTRG.8471	No	No	SP(Sec/SPI)	0.997852	extr	Pfam;SUPERFAMILY;Gene3D	PF01099;SSF48201;G3DSA:1.10.210.10	Uteroglobin family;Uteroglobin-like;Secretoglobin	IPR016126;IPR035960;-	Secretoglobin;Secretoglobin superfamily;-	-	No hits	NA	NA	No hits	NA	NA	No hits	NA	NA	No hits	NA	NA	None	NA
References:
Torres AM, Wang X, Fletcher JI, Alewood D, Alewood PF, Smith R, et al. Solution structure of a defensin-like peptide from platypus venom. Biochemical Journal. 1999;341(3):785-94.
Whittington CM, Papenfuss AT, Locke DP, Mardis ER, Wilson RK, Abubucker S, et al. Novel venom gene discovery in the platypus. Genome Biology. 2010;11(9): article no. R95.
Whittington CM, Papenfuss AT, Bansal P, Torres AM, Wong ESW, Deakin JE, et al. Defensins and the convergent evolution of platypus and reptile venom genes. Genome Research. 2008;18(6):986-94.
Wong E, Morgenstern D, Mofiz E, Gombert S, Morris KM, Temple-Smith P, et al. Proteomics and deep sequencing comparison of seasonally active venom glands in the platypus reveals novel venom peptides and distinct expression profiles. Molecular & Cellular Proteomics. 2012;11(11):1354-64.
