# Supplementary material for: Insights into Platypus Crural Gland Transcriptomics – Venom and Beyond
Source: Research Square preprint supplement (doi:10.21203/rs.3.rs-7394805/v1), 2025-09-02
Supplement: Supplementary file 3 [file a6f1cda590e67d6b80715d74.xlsx]

## Sheet: Tissue KLKs
Tree Sequence Accessions
Tissue KLKs
Accession	Tree Label	Accession source	Species Scientific Name	Species Common Name	Kallikrein Member	Venom	Additional Info
Q5FBW2	BLABR_Blarinasin-1	UniProt	Blarina brevicauda	Short-tailed shrew	KLK1	No
Q5FBW1	BLABR_Blarinasin-2	UniProt	Blarina brevicauda	Short-tailed shrew	KLK1	No
Q76B45	BLABR_BLTX	UniProt	Blarina brevicauda	Short-tailed shrew	KLK1	Yes
A0A7D4X669	BLABR_KLK1-BL1	UniProt	Blarina brevicauda	Short-tailed shrew	KLK1	No
A0A7D5AV14	BLABR_KLK1-BL2	UniProt	Blarina brevicauda	Short-tailed shrew	KLK1	Putative
A0A7D4WYS9	BLABR_KLK1-BL3	UniProt	Blarina brevicauda	Short-tailed shrew	KLK1	No
P12322	CAVPO_KLK1	UniProt	Cavia porcellus	Domestic guinea pig	KLK1	No
P12323	CAVPO_KLK2	UniProt	Cavia porcellus	Domestic guinea pig	KLK2	No
XP_024422148.3	DESRO_KLK1	NCBI	Desmodus rotundus	Common vampire bat	KLK1	No
XP_024422190.2	DESRO_KLK10	NCBI	Desmodus rotundus	Common vampire bat	KLK10	No
XP_045056257.2	DESRO_KLK11-X1	NCBI	Desmodus rotundus	Common vampire bat	KLK11	No
XP_045056263.1	DESRO_KLK12-X1	NCBI	Desmodus rotundus	Common vampire bat	KLK12	No
XP_045056264.1	DESRO_KLK12-X3	NCBI	Desmodus rotundus	Common vampire bat	KLK12	No
XP_024422187.1	DESRO_KLK13-X1	NCBI	Desmodus rotundus	Common vampire bat	KLK13	No
XP_045056256.1	DESRO_KLK13-X2	NCBI	Desmodus rotundus	Common vampire bat	KLK13	No
XP_024422112.1	DESRO_KLK14	NCBI	Desmodus rotundus	Common vampire bat	KLK14	No
XP_024422150.2	DESRO_KLK15	NCBI	Desmodus rotundus	Common vampire bat	KLK15	No
XP_045056249.2	DESRO_KLK5	NCBI	Desmodus rotundus	Common vampire bat	KLK5	No
XP_045056250.2	DESRO_KLK6-like-X1	NCBI	Desmodus rotundus	Common vampire bat	KLK6	No
XP_024422152.1	DESRO_KLK7-like	NCBI	Desmodus rotundus	Common vampire bat	KLK7	No
XP_045056262.1	DESRO_KLK8	NCBI	Desmodus rotundus	Common vampire bat	KLK8	No
XP_024422192.1	DESRO_KLK9	NCBI	Desmodus rotundus	Common vampire bat	KLK9	No
M0QRN6	DESRO_KLKDr1	UniProt	Desmodus rotundus	Common vampire bat	KLK1	Yes
Q6H321	HORSE_KLK2	UniProt	Equus caballus	Horse	KLK2	No
P07477	HUMAN_TRY1	UniProt	Homo sapiens	Human	NA	No	Root
P06870	HUMAN_KLK1	UniProt	Homo sapiens	Human	KLK1	No
O43240	HUMAN_KLK10	UniProt	Homo sapiens	Human	KLK10	No
Q9UBX7	HUMAN_KLK11	UniProt	Homo sapiens	Human	KLK11	No
Q9UKR0	HUMAN_KLK12	UniProt	Homo sapiens	Human	KLK12	No
Q9UKR3	HUMAN_KLK13	UniProt	Homo sapiens	Human	KLK13	No
Q9P0G3	HUMAN_KLK14	UniProt	Homo sapiens	Human	KLK14	No
Q9H2R5	HUMAN_KLK15	UniProt	Homo sapiens	Human	KLK15	No
P20151	HUMAN_KLK2	UniProt	Homo sapiens	Human	KLK2	No
P07288	HUMAN_KLK3	UniProt	Homo sapiens	Human	KLK3	No
Q9Y5K2	HUMAN_KLK4	UniProt	Homo sapiens	Human	KLK4	No
Q9Y337	HUMAN_KLK5	UniProt	Homo sapiens	Human	KLK5	No
Q92876	HUMAN_KLK6	UniProt	Homo sapiens	Human	KLK6	No
P49862	HUMAN_KLK7	UniProt	Homo sapiens	Human	KLK7	No
O60259	HUMAN_KLK8	UniProt	Homo sapiens	Human	KLK8	No
Q9UKQ9	HUMAN_KLK9	UniProt	Homo sapiens	Human	KLK9	No
Q07276	MACFA_KLK1	UniProt	Macaca fascicularis	Crab-eating macaque	KLK1	No
Q6DT45	MACFA_KLK3	UniProt	Macaca fascicularis	Crab-eating macaque	KLK3	No
P33619	MACMU_KLK3	UniProt	Macaca mulatta	Rhesus monkey	KLK3	No
P36368	MOUSE_KLK13	UniProt	Mus musculus	House mouse	KLK13	No
P15947	MOUSE_KLK1	UniProt	Mus musculus	House mouse	KLK1	No
Q9QYN3	MOUSE_KLK11	UniProt	Mus musculus	House mouse	KLK11	No
Q8CGR5	MOUSE_KLK14	UniProt	Mus musculus	House mouse	KLK14	No
P00755	MOUSE_KLK1b1	UniProt	Mus musculus	House mouse	KLK1	No
P15946	MOUSE_KLK1b11	UniProt	Mus musculus	House mouse	KLK1	No
P04071	MOUSE_KLK1b16	UniProt	Mus musculus	House mouse	KLK1	No
Q61759	MOUSE_KLK1b21	UniProt	Mus musculus	House mouse	KLK1	No
P15948	MOUSE_KLK1b22	UniProt	Mus musculus	House mouse	KLK1	No
Q61754	MOUSE_KLK1b24	UniProt	Mus musculus	House mouse	KLK1	No
P36369	MOUSE_KLK1b26	UniProt	Mus musculus	House mouse	KLK1	No
Q9JM71	MOUSE_KLK1b27	UniProt	Mus musculus	House mouse	KLK1	No
P00756	MOUSE_KLK1b3	UniProt	Mus musculus	House mouse	KLK1	No
P00757	MOUSE_KLK1b4	UniProt	Mus musculus	House mouse	KLK1	No
P15945	MOUSE_KLK1b5	UniProt	Mus musculus	House mouse	KLK1	No
P07628	MOUSE_KLK1b8	UniProt	Mus musculus	House mouse	KLK1	No
P15949	MOUSE_KLK1b9	UniProt	Mus musculus	House mouse	KLK1	No
Q9Z0M1	MOUSE_KLK4	UniProt	Mus musculus	House mouse	KLK4	No
Q91VE3	MOUSE_KLK7	UniProt	Mus musculus	House mouse	KLK7	No
Q61955	MOUSE_KLK8	UniProt	Mus musculus	House mouse	KLK8	No
XP_053464082.1	NYCCO_KLK1	NCBI	Nycticebus coucang	Slow loris	KLK1	No
XP_053462983.1	NYCCO_KLK10-X1	NCBI	Nycticebus coucang	Slow loris	KLK10	No
XP_053462981.1	NYCCO_KLK11	NCBI	Nycticebus coucang	Slow loris	KLK11	No
XP_053462973.1	NYCCO_KLK12-X1	NCBI	Nycticebus coucang	Slow loris	KLK12	No
XP_053462977.1	NYCCO_KLK12-X3	NCBI	Nycticebus coucang	Slow loris	KLK12	No
XP_053462978.1	NYCCO_KLK12-X4	NCBI	Nycticebus coucang	Slow loris	KLK12	No
XP_053463717.1	NYCCO_KLK13-X1	NCBI	Nycticebus coucang	Slow loris	KLK13	No
XP_053463719.1	NYCCO_KLK13-X3	NCBI	Nycticebus coucang	Slow loris	KLK13	No
XP_053463715.1	NYCCO_KLK14	NCBI	Nycticebus coucang	Slow loris	KLK14	No
XP_053462115.1	NYCCO_KLK15	NCBI	Nycticebus coucang	Slow loris	KLK15	No
XP_053464083.1	NYCCO_KLK2-like-X1	NCBI	Nycticebus coucang	Slow loris	KLK2	No
XP_053462302.1	NYCCO_KLK2-like-X2	NCBI	Nycticebus coucang	Slow loris	KLK2	No
XP_053462301.1	NYCCO_KLK4-like	NCBI	Nycticebus coucang	Slow loris	KLK4	No
XP_053462298.1	NYCCO_KLK4-like-X1	NCBI	Nycticebus coucang	Slow loris	KLK4	No
XP_053463016.1	NYCCO_KLK5	NCBI	Nycticebus coucang	Slow loris	KLK5	No
XP_053463014.1	NYCCO_KLK6-X1	NCBI	Nycticebus coucang	Slow loris	KLK6	No
XP_053462847.1	NYCCO_KLK7	NCBI	Nycticebus coucang	Slow loris	KLK7	No
XP_053462987.1	NYCCO_KLK8	NCBI	Nycticebus coucang	Slow loris	KLK8	No
XP_053462988.1	NYCCO_KLK9	NCBI	Nycticebus coucang	Slow loris	KLK9	No
XP_028920201.1	ORNAN_KLK1	NCBI	Ornithorhynchus anatinus	Platypus	KLK1	Putative	Putative toxin in this study (XM_029064368.2_ORF.9)
XP_028922526.1	ORNAN_KLK10	NCBI	Ornithorhynchus anatinus	Platypus	KLK10	No
XP_028922004.1	ORNAN_KLK11	NCBI	Ornithorhynchus anatinus	Platypus	KLK11	No
XP_028921753.1	ORNAN_KLK12	NCBI	Ornithorhynchus anatinus	Platypus	KLK12	No
XP_028921751.1	ORNAN_KLK13	NCBI	Ornithorhynchus anatinus	Platypus	KLK13	No
XP_039768118.1	ORNAN_KLK14	NCBI	Ornithorhynchus anatinus	Platypus	KLK14	No
XP_028920867.1	ORNAN_KLK15	NCBI	Ornithorhynchus anatinus	Platypus	KLK15	No
XP_028921945.1	ORNAN_KLK5	NCBI	Ornithorhynchus anatinus	Platypus	KLK5	No
XP_028920161.1	ORNAN_KLK6	NCBI	Ornithorhynchus anatinus	Platypus	KLK6	Putative	Putative toxin in this study (XM_029064328.1_ORF.5)
XP_028920160.1	ORNAN_KLK7	NCBI	Ornithorhynchus anatinus	Platypus	KLK7	Putative	Putative toxin in this study (XM_029064327.1_ORF.1)
XP_028920866.1	ORNAN_KLK8	NCBI	Ornithorhynchus anatinus	Platypus	KLK8	No
XP_028920202.1	ORNAN_KLK8-like	NCBI	Ornithorhynchus anatinus	Platypus	KLK8	No
XP_028920865.1	ORNAN_KLK9	NCBI	Ornithorhynchus anatinus	Platypus	KLK9	No
Q28773	PAPHA_KLK1	UniProt	Papio hamadryas	Hamadryas baboon	KLK1	No
P00752	PIG_KLK1	UniProt	Sus scrofa	Pig	KLK1	No
P00758	RAT_KLK1	UniProt	Rattus norvegicus	Norway rat	KLK1	No
P36375	RAT_KLK10	UniProt	Rattus norvegicus	Norway rat	KLK10	No
P36376	RAT_KLK12	UniProt	Rattus norvegicus	Norway rat	KLK12	No
P00759	RAT_KLK2	UniProt	Rattus norvegicus	Norway rat	KLK2	No
P15950	RAT_KLK3	UniProt	Rattus norvegicus	Norway rat	KLK3	No
P36374	RAT_KLK6	UniProt	Rattus norvegicus	Norway rat	KLK6	No
P36373	RAT_KLK7	UniProt	Rattus norvegicus	Norway rat	KLK7	No
O88780	RAT_KLK8	UniProt	Rattus norvegicus	Norway rat	KLK8	No
P07647	RAT_KLK9	UniProt	Rattus norvegicus	Norway rat	KLK9	No
Q7JIG6	SAGOE_KLK15	UniProt	Saguinus oedipus	Cotton-top tamarin	KLK15	No
NA	SOLPA_KLK10-8314	Casewell, N.R., et al., Solenodon genome reveals convergent evolution of venom in eulipotyphlan mammals. Proceedings of the National Academy of Sciences, 2019. 116(51): p. 25745-25755.	Solenodon paradoxus	Hispaniolan solenodon	KLK10	No
NA	SOLPA_KLK1-10668	Casewell, N.R., et al., Solenodon genome reveals convergent evolution of venom in eulipotyphlan mammals. Proceedings of the National Academy of Sciences, 2019. 116(51): p. 25745-25755.	Solenodon paradoxus	Hispaniolan solenodon	KLK1	Yes
NA	SOLPA_KLK11-12742	Casewell, N.R., et al., Solenodon genome reveals convergent evolution of venom in eulipotyphlan mammals. Proceedings of the National Academy of Sciences, 2019. 116(51): p. 25745-25755.	Solenodon paradoxus	Hispaniolan solenodon	KLK11	No
NA	SOLPA_KLK1-1307	Casewell, N.R., et al., Solenodon genome reveals convergent evolution of venom in eulipotyphlan mammals. Proceedings of the National Academy of Sciences, 2019. 116(51): p. 25745-25755.	Solenodon paradoxus	Hispaniolan solenodon	KLK1	Yes
NA	SOLPA_KLK1-16542	Casewell, N.R., et al., Solenodon genome reveals convergent evolution of venom in eulipotyphlan mammals. Proceedings of the National Academy of Sciences, 2019. 116(51): p. 25745-25755.	Solenodon paradoxus	Hispaniolan solenodon	KLK1	Yes
NA	SOLPA_KLK1-3713	Casewell, N.R., et al., Solenodon genome reveals convergent evolution of venom in eulipotyphlan mammals. Proceedings of the National Academy of Sciences, 2019. 116(51): p. 25745-25755.	Solenodon paradoxus	Hispaniolan solenodon	KLK1	No
NA	SOLPA_KLK13-7930	Casewell, N.R., et al., Solenodon genome reveals convergent evolution of venom in eulipotyphlan mammals. Proceedings of the National Academy of Sciences, 2019. 116(51): p. 25745-25755.	Solenodon paradoxus	Hispaniolan solenodon	KLK13	No
NA	SOLPA_KLK1-490	Casewell, N.R., et al., Solenodon genome reveals convergent evolution of venom in eulipotyphlan mammals. Proceedings of the National Academy of Sciences, 2019. 116(51): p. 25745-25755.	Solenodon paradoxus	Hispaniolan solenodon	KLK1	Yes
NA	SOLPA_KLK15-10610	Casewell, N.R., et al., Solenodon genome reveals convergent evolution of venom in eulipotyphlan mammals. Proceedings of the National Academy of Sciences, 2019. 116(51): p. 25745-25755.	Solenodon paradoxus	Hispaniolan solenodon	KLK15	No
NA	SOLPA_KLK15-10924	Casewell, N.R., et al., Solenodon genome reveals convergent evolution of venom in eulipotyphlan mammals. Proceedings of the National Academy of Sciences, 2019. 116(51): p. 25745-25755.	Solenodon paradoxus	Hispaniolan solenodon	KLK15	No
NA	SOLPA_KLK15-11033	Casewell, N.R., et al., Solenodon genome reveals convergent evolution of venom in eulipotyphlan mammals. Proceedings of the National Academy of Sciences, 2019. 116(51): p. 25745-25755.	Solenodon paradoxus	Hispaniolan solenodon	KLK15	No
NA	SOLPA_KLK15-14721	Casewell, N.R., et al., Solenodon genome reveals convergent evolution of venom in eulipotyphlan mammals. Proceedings of the National Academy of Sciences, 2019. 116(51): p. 25745-25755.	Solenodon paradoxus	Hispaniolan solenodon	KLK15	No
NA	SOLPA_KLK15-14767	Casewell, N.R., et al., Solenodon genome reveals convergent evolution of venom in eulipotyphlan mammals. Proceedings of the National Academy of Sciences, 2019. 116(51): p. 25745-25755.	Solenodon paradoxus	Hispaniolan solenodon	KLK15	No
NA	SOLPA_KLK15-16543	Casewell, N.R., et al., Solenodon genome reveals convergent evolution of venom in eulipotyphlan mammals. Proceedings of the National Academy of Sciences, 2019. 116(51): p. 25745-25755.	Solenodon paradoxus	Hispaniolan solenodon	KLK15	No
NA	SOLPA_KLK15-4118	Casewell, N.R., et al., Solenodon genome reveals convergent evolution of venom in eulipotyphlan mammals. Proceedings of the National Academy of Sciences, 2019. 116(51): p. 25745-25755.	Solenodon paradoxus	Hispaniolan solenodon	KLK15	No
NA	SOLPA_KLK15-9244	Casewell, N.R., et al., Solenodon genome reveals convergent evolution of venom in eulipotyphlan mammals. Proceedings of the National Academy of Sciences, 2019. 116(51): p. 25745-25755.	Solenodon paradoxus	Hispaniolan solenodon	KLK15	No
NA	SOLPA_KLK1-7098	Casewell, N.R., et al., Solenodon genome reveals convergent evolution of venom in eulipotyphlan mammals. Proceedings of the National Academy of Sciences, 2019. 116(51): p. 25745-25755.	Solenodon paradoxus	Hispaniolan solenodon	KLK1	Yes
NA	SOLPA_KLK1-7673	Casewell, N.R., et al., Solenodon genome reveals convergent evolution of venom in eulipotyphlan mammals. Proceedings of the National Academy of Sciences, 2019. 116(51): p. 25745-25755.	Solenodon paradoxus	Hispaniolan solenodon	KLK1	Yes
NA	SOLPA_KLK1-9643	Casewell, N.R., et al., Solenodon genome reveals convergent evolution of venom in eulipotyphlan mammals. Proceedings of the National Academy of Sciences, 2019. 116(51): p. 25745-25755.	Solenodon paradoxus	Hispaniolan solenodon	KLK1	Yes
NA	SOLPA_KLK5-4119	Casewell, N.R., et al., Solenodon genome reveals convergent evolution of venom in eulipotyphlan mammals. Proceedings of the National Academy of Sciences, 2019. 116(51): p. 25745-25755.	Solenodon paradoxus	Hispaniolan solenodon	KLK5	No
NA	SOLPA_KLK6-4120	Casewell, N.R., et al., Solenodon genome reveals convergent evolution of venom in eulipotyphlan mammals. Proceedings of the National Academy of Sciences, 2019. 116(51): p. 25745-25755.	Solenodon paradoxus	Hispaniolan solenodon	KLK6	No
NA	SOLPA_KLK7-10894	Casewell, N.R., et al., Solenodon genome reveals convergent evolution of venom in eulipotyphlan mammals. Proceedings of the National Academy of Sciences, 2019. 116(51): p. 25745-25755.	Solenodon paradoxus	Hispaniolan solenodon	KLK7	No
NA	SOLPA_KLK8-10893	Casewell, N.R., et al., Solenodon genome reveals convergent evolution of venom in eulipotyphlan mammals. Proceedings of the National Academy of Sciences, 2019. 116(51): p. 25745-25755.	Solenodon paradoxus	Hispaniolan solenodon	KLK8	No
NA	SOLPA_KLK9-8313	Casewell, N.R., et al., Solenodon genome reveals convergent evolution of venom in eulipotyphlan mammals. Proceedings of the National Academy of Sciences, 2019. 116(51): p. 25745-25755.	Solenodon paradoxus	Hispaniolan solenodon	KLK9	No
XP_012790748.2	SORAR_KLK1	NCBI	Sorex araneus	European shrew	KLK1	No
XP_004619827.1	SORAR_KLK10	NCBI	Sorex araneus	European shrew	KLK10	No
XP_055002062.1	SORAR_KLK11	NCBI	Sorex araneus	European shrew	KLK11	No
XP_004619828.2	SORAR_KLK12-X1	NCBI	Sorex araneus	European shrew	KLK12	No
XP_055002099.1	SORAR_KLK12-X2	NCBI	Sorex araneus	European shrew	KLK12	No
XP_055002053.1	SORAR_KLK13	NCBI	Sorex araneus	European shrew	KLK13	No
XP_004619830.2	SORAR_KLK14	NCBI	Sorex araneus	European shrew	KLK14	No
XP_004619930.1	SORAR_KLK15	NCBI	Sorex araneus	European shrew	KLK15	No
XP_004619931.1	SORAR_KLK4	NCBI	Sorex araneus	European shrew	KLK4	No
XP_004619932.1	SORAR_KLK5	NCBI	Sorex araneus	European shrew	KLK5	No
XP_004619824.2	SORAR_KLK6	NCBI	Sorex araneus	European shrew	KLK6	No
XP_055002052.1	SORAR_KLK7	NCBI	Sorex araneus	European shrew	KLK7	No
XP_004619933.2	SORAR_KLK8	NCBI	Sorex araneus	European shrew	KLK8	No
XP_004619826.1	SORAR_KLK9	NCBI	Sorex araneus	European shrew	KLK9	No

## Sheet: Secretoglobins
Tree Sequence Accessions
Secretoglobins
Accession	Tree Label	Accession source	Species Scientific Name	Species Common Name	Secretoglobin Member	Venom	Additional Info
A0JNP2	BOVIN_SG1D	UniProt	Bos taurus	Domestic cattle	SCGB1D	No
Q2VPS3	BOVIN_UTER	UniProt	Bos taurus	Domestic cattle	UTER	No
XP_024430331.1	DESRO_SG1C1	NCBI	Desmodus rotundus	Common vampire bat	SCGB1C	No
XP_024412547.2	DESRO_SG1C2-like	NCBI	Desmodus rotundus	Common vampire bat	SCGB1C-like	No
JAA44835.1	DESRO_SG1D	NCBI	Desmodus rotundus	Common vampire bat	SCGB1D	No
XP_053780707.1	DESRO_SG1D2-like	NCBI	Desmodus rotundus	Common vampire bat	SCGB1D-like	No
XP_024429764.1	DESRO_SG1D2-like-2	NCBI	Desmodus rotundus	Common vampire bat	SCGB1D-like	No
K9IGD4	DESRO_SG3A1	UniProt	Desmodus rotundus	Common vampire bat	SCGB3A	No
JAA45108.1	DESRO_SG3A1-2	NCBI	Desmodus rotundus	Common vampire bat	SCGB3A	No
K9IFS8	DESRO_SG3A2	UniProt	Desmodus rotundus	Common vampire bat	SCGB3A	No
XP_024432770.1	DESRO_SG3A2-2	NCBI	Desmodus rotundus	Common vampire bat	SCGB3A	No
M0QRT6	DESRO_SGDr1	UniProt	Desmodus rotundus	Common vampire bat	Novel	Yes
K9IFS6	DESRO_UTER	UniProt	Desmodus rotundus	Common vampire bat	UTER	No
P30438	FELCA_FEL1A	UniProt	Felis catus	Domestic cat	SCGB1B	No
P30440	FELCA_FEL1B	UniProt	Felis catus	Domestic cat	SCGB2B	No
NA	FELCA_FEL1B-alt	Scheib, H., et al., The toxicological intersection between allergen and toxin: a structural comparison of the cat dander allergenic protein Fel d1 and the slow loris brachial gland secretion protein. Toxins, 2020. 12(2): article no. 86.	Felis catus	Domestic cat	SCGB2B	No
Q8MKG2	HORSE_UTER	UniProt	Equus caballus	Horse	UTER	No
P69905	HUMAN_HEMO	UniProt	Homo sapiens	Human	NA	No	Root
Q8TD33	HUMAN_SG1C1	UniProt	Homo sapiens	Human	SCGB1C	No
P0DMR2	HUMAN_SG1C2	UniProt	Homo sapiens	Human	SCGB1C	No
O95968	HUMAN_SG1D1	UniProt	Homo sapiens	Human	SCGB1D	No
O95969	HUMAN_SG1D2	UniProt	Homo sapiens	Human	SCGB1D	No
Q6XE38	HUMAN_SG1D4	UniProt	Homo sapiens	Human	SCGB1D	No
O75556	HUMAN_SG2A1	UniProt	Homo sapiens	Human	SCGB2A	No
Q13296	HUMAN_SG2A2	UniProt	Homo sapiens	Human	SCGB2A	No
Q4G0G5	HUMAN_SG2B2	UniProt	Homo sapiens	Human	SCGB2B	No
Q96QR1	HUMAN_SG3A1	UniProt	Homo sapiens	Human	SCGB3A	No
Q96PL1	HUMAN_SG3A2	UniProt	Homo sapiens	Human	SCGB3A	No
P11684	HUMAN_UTER	UniProt	Homo sapiens	Human	UTER	No
P06913	LEPCA_UTER	UniProt	Lepus capensis	Brown hare	UTER	No
Q9TS45	MACFU_UTER	UniProt	Macaca fuscata fuscata	Japanese macaque	UTER	No
Q0PGP2	MESAU_ABP	UniProt	Mesocricetus auratus	Golden hamster	SCGB2B	No
Q8VD96	MESAU_UTER	UniProt	Mesocricetus auratus	Golden hamster	UTER	No
Q9JI02	MOUSE_S2B20	UniProt	Mus musculus	House mouse	SCGB2B	No
Q7M747	MOUSE_S2B24	UniProt	Mus musculus	House mouse	SCGB2B	No
Q7M742	MOUSE_SG1C1	UniProt	Mus musculus	House mouse	SCGB1C	No
Q6UGQ3	MOUSE_SG2B2	UniProt	Mus musculus	House mouse	SCGB2B	No
Q920D7	MOUSE_SG3A1	UniProt	Mus musculus	House mouse	SCGB3A	No
Q920H1	MOUSE_SG3A2	UniProt	Mus musculus	House mouse	SCGB3A	No
Q06318	MOUSE_UTER	UniProt	Mus musculus	House mouse	UTER	No
Q65C83	NEOAS_UTER	UniProt	Neotomodon alstoni	Mexican volcano mouse	UTER	No
NA	NYCCO_BGE-A	Ligabue-Braun, R., Hello, kitty: could cat allergy be a form of intoxication? The Journal of Venomous Animals and Toxins Including Tropical Diseases, 2020. 26: article no. e20200051.	Nycticebus coucang	Slow loris	Novel	Yes
NA	NYCCO_BGE-B	Ligabue-Braun, R., Hello, kitty: could cat allergy be a form of intoxication? The Journal of Venomous Animals and Toxins Including Tropical Diseases, 2020. 26: article no. e20200051.	Nycticebus coucang	Slow loris	Novel	Yes
XP_053418120.1	NYCCO_SG1C1	NCBI	Nycticebus coucang	Slow loris	SCGB1C	No
XP_053415751.1	NYCCO_SG1D1	NCBI	Nycticebus coucang	Slow loris	SCGB1D	No
XP_053418291.1	NYCCO_SG1D2-like	NCBI	Nycticebus coucang	Slow loris	SCGB1D-like	No
XP_053418290.1	NYCCO_SG2A1	NCBI	Nycticebus coucang	Slow loris	SCGB2A	No
XP_053421956.1	NYCCO_SG3A1	NCBI	Nycticebus coucang	Slow loris	SCGB3A	No
XP_053422830.1	NYCCO_SG3A2	NCBI	Nycticebus coucang	Slow loris	SCGB3A	No
XP_053421923.1	NYCCO_SG3A2-like	NCBI	Nycticebus coucang	Slow loris	SCGB3A-like	No
NA	NYCJA_BGE-A	Scheib, H., et al., The toxicological intersection between allergen and toxin: a structural comparison of the cat dander allergenic protein Fel d1 and the slow loris brachial gland secretion protein. Toxins, 2020. 12(2): article no. 86.	Nycticebus javanicus	Javan slow loris	Novel	Yes
NA	NYCJA_BGE-B	Scheib, H., et al., The toxicological intersection between allergen and toxin: a structural comparison of the cat dander allergenic protein Fel d1 and the slow loris brachial gland secretion protein. Toxins, 2020. 12(2): article no. 86.	Nycticebus javanicus	Javan slow loris	Novel	Yes
NA	NYCPY_BGE-A	Ligabue-Braun, R., Hello, kitty: could cat allergy be a form of intoxication? The Journal of Venomous Animals and Toxins Including Tropical Diseases, 2020. 26: article no. e20200051.	Nycticebus pygmaeus	Pygmy slow loris	Novel	Yes
NA	NYCPY_BGE-B	Ligabue-Braun, R., Hello, kitty: could cat allergy be a form of intoxication? The Journal of Venomous Animals and Toxins Including Tropical Diseases, 2020. 26: article no. e20200051.	Nycticebus pygmaeus	Pygmy slow loris	Novel	Yes
XP_028917630.1	ORNAN_SG1C1	NCBI	Ornithorhynchus anatinus	Platypus	SCGB1C	No
XP_028914749.1	ORNAN_SG2A2-like	NCBI	Ornithorhynchus anatinus	Platypus	SCGB2A-like	No
NA	ORNAN_SG-MSTRG7926	This study	Ornithorhynchus anatinus	Platypus	UTER-like	No
NA	ORNAN_SG-MSTRG8465	This study	Ornithorhynchus anatinus	Platypus	UTER-like	Putative	Putative toxin in this study (MSTRG8465.1_ORF.3)
NA	ORNAN_SG-MSTRG8468	This study	Ornithorhynchus anatinus	Platypus	UTER-like	No
NA	ORNAN_SG-MSTRG8471	This study	Ornithorhynchus anatinus	Platypus	UTER-like	Putative	Putative toxin in this study (MSTRG8471.1_ORF.3)
XP_001506166.1	ORNAN_UTER	NCBI	Ornithorhynchus anatinus	Platypus	UTER	No
XP_007654096.2	ORNAN_UTER-like	NCBI	Ornithorhynchus anatinus	Platypus	UTER-like	No
XP_016081846.1	ORNAN_UTER-like-2	NCBI	Ornithorhynchus anatinus	Platypus	UTER-like	Putative	Putative toxin in this study (XM_016226360.3_ORF.1)
P02779	RABIT_UTER	UniProt	Oryctolagus cuniculus	Rabbit	UTER	No
Q05702	RAT_SG1C1	UniProt	Rattus norvegicus	Norway rat	SCGB1C	No
P02781	RAT_SG1D	UniProt	Rattus norvegicus	Norway rat	SCGB1D	No
P02782	RAT_SG1D2	UniProt	Rattus norvegicus	Norway rat	SCGB1D	No
Q9JHB9	RAT_SG2A1	UniProt	Rattus norvegicus	Norway rat	SCGB2A	No
P02780	RAT_SG2A2	UniProt	Rattus norvegicus	Norway rat	SCGB2A	No
P17559	RAT_UTER	UniProt	Rattus norvegicus	Norway rat	UTER	No
XP_004603212.1	SORAR_SG1C1	NCBI	Sorex araneus	European shrew	SCGB1C	No
XP_055000059.1	SORAR_SG1D1-like	NCBI	Sorex araneus	European shrew	SCGB1D-like	No
XP_054999792.1	SORAR_SG1D1-like-2	NCBI	Sorex araneus	European shrew	SCGB1D-like	No
XP_055000111.1	SORAR_SG1D2-like	NCBI	Sorex araneus	European shrew	SCGB1D-like	No
XP_055000041.1	SORAR_SG1D2-like-2	NCBI	Sorex araneus	European shrew	SCGB1D-like	No
XP_054999906.1	SORAR_SG1D2-like-3	NCBI	Sorex araneus	European shrew	SCGB1D-like	No
XP_054999905.1	SORAR_SG1D2-like-4	NCBI	Sorex araneus	European shrew	SCGB1D-like	No
XP_054998751.1	SORAR_SG1D2-like-5	NCBI	Sorex araneus	European shrew	SCGB1D-like	No
XP_054998715.1	SORAR_SG1D2-like-X1	NCBI	Sorex araneus	European shrew	SCGB1D-like	No
XP_054998717.1	SORAR_SG1D2-like-X3	NCBI	Sorex araneus	European shrew	SCGB1D-like	No
XP_055000035.1	SORAR_SG1D-like	NCBI	Sorex araneus	European shrew	SCGB1D-like	No
XP_054999014.1	SORAR_SG1D-like-2	NCBI	Sorex araneus	European shrew	SCGB1D-like	No
XP_004615416.1	SORAR_SG3A1	NCBI	Sorex araneus	European shrew	SCGB3A	No
XP_004618237.1	SORAR_SG3A2	NCBI	Sorex araneus	European shrew	SCGB3A	No
XP_054997221.1	SORAR_UTER	NCBI	Sorex araneus	European shrew	UTER	No
